# Supplementary material for: Streamlined selection of cancer antigens for vaccine development through integrative multi-omics and high-content cell imaging
Source: PubMed Central journal article supplement (PMC7125174; doi:10.1038/s41598-020-62244-z), 2020-04-03
Supplement: 41598_2020_62244_MOESM1_ESM.pdf [file 41598_2020_62244_MOESM1_ESM.pdf]

**Supplementary Information**

**Streamlined selection of cancer antigens for vaccine development through integrative multi-omics and high-content cell imaging**

Ki-Cheol Han, Daechan Park, Shinyeong Ju, Anna Ju, Sun-Hee Heo, Young-Ae Kim, Young Eun Lee, Ji Eun Lee, Kyong Hwa Park, Se-Ho Park, Hee Jin Lee, Cheolju Lee and Mihue Jang

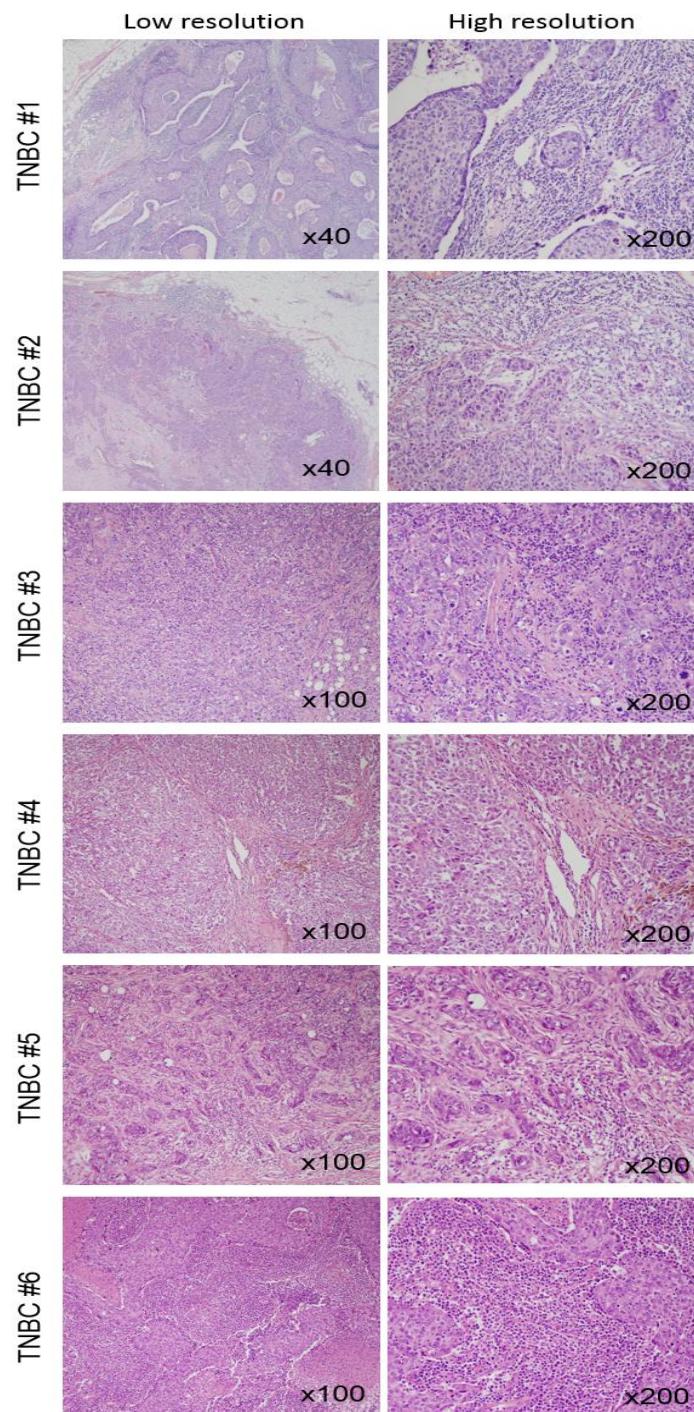

**Figure S1.** TIL identification in TNBC tissues. Hematoxylin and eosin staining showing the presence of TILs in TNBC tissues. The proportion of the stromal area infiltrated by lymphocytes was measured to obtain a TIL-density score.

| TNBC#1        |                  |               |                   |
|---------------|------------------|---------------|-------------------|
| TCR $\alpha$  |                  | TCR $\beta$   |                   |
| cloneFraction | aaSeqCDR3        | cloneFraction | aaSeqCDR3         |
| 0.0732        | CAGTLINQAGTALIF  | 0.0957        | CASSLGSKRSSYNEQFF |
| 0.0610        | CIVRTGSARQLTF    | 0.0426        | CASSTRDRHFYNEQFF  |
| 0.0366        | CALDPSISATNKLIF  | 0.0426        | CASSERASGRDNEQFF  |
| 0.0366        | CLVGDRKNQGGKLIFF | 0.0426        | CASSLSGLPGYTF     |
| 0.0366        | CAVGGPGNFNKFYF   | 0.0319        | CASSPADNTDTQYF    |
| 0.0244        | CAVSLGDTSGTDKLIF | 0.0319        | CSASGVRPDTQYF     |
| 0.0244        | CVVSRFSGNTPLVF   | 0.0319        | CSAYKSQETQYF      |
| 0.0244        | CAVRSSGSARQLTF   | 0.0213        | CASSLAPTGGPYEQYF  |
| 0.0244        | CVVSSYNTDKLIF    | 0.0213        | CASSLYLSGANVLTF   |
| 0.0244        | CAASKGGYQKVTFF   | 0.0213        | CASSPRPFSNQPQHF   |

| TNBC#2        |                   |               |                  |
|---------------|-------------------|---------------|------------------|
| TCR $\alpha$  |                   | TCR $\beta$   |                  |
| cloneFraction | aaSeqCDR3         | cloneFraction | aaSeqCDR3        |
| 0.1185        | CLVAAGYSTLTF      | 0.0390        | CASSQLDREEGTDQYF |
| 0.0488        | CAFANNDMRF        | 0.0390        | CSVPNLAGGSYNEQFF |
| 0.0223        | CAVKTSYDKVIF      | 0.0264        | CASSLLAGGHNEQFF  |
| 0.0153        | CATDELGKLVF       | 0.0229        | CASRGGSPYEYF     |
| 0.0139        | CAVSDYNQGGKLIFF   | 0.0218        | CASSYSTVYGYTF    |
| 0.0112        | CAVELAGNNRKLW     | 0.0115        | CASSLERGTEAFF    |
| 0.0098        | CLVAHRGSSNTGKLIFF | 0.0103        | CASSSRVYNEQFF    |
| 0.0084        | CAVTRGR_FGNVLHC   | 0.0092        | CAISETWTSGRQTYF  |
| 0.0084        | CAVNEGGSYIPTF     | 0.0092        | CASSTPGTAGELFF   |
| 0.0084        | CAPGGKRALTF       | 0.0092        | CASSQVNTTEAFF    |

| TNBC#3        |                     |               |                     |
|---------------|---------------------|---------------|---------------------|
| TCR $\alpha$  |                     | TCR $\beta$   |                     |
| cloneFraction | aaSeqCDR3           | cloneFraction | aaSeqCDR3           |
| 0.0550        | CAMSGGSGAGSYQLTF    | 0.0335        | CASSETTGALQFF       |
| 0.0367        | CAVQRQGGSEKLVF      | 0.0209        | CASSLRRLPPEYQYF     |
| 0.0275        | CALSFPSGGSYIPTF     | 0.0209        | CASSRLGSSYNEQFF     |
| 0.0275        | CAERMDSSYKLIFF      | 0.0209        | CASSTAGNTIYF        |
| 0.0275        | CAFNNAGNMLTF        | 0.0167        | CASVAGTGLRNEQFF     |
| 0.0183        | CAAIRIEAVYGGGADGLTF | 0.0167        | CASSLDLNRETEAFF     |
| 0.0183        | CVVSGRSGAGSYQLTF    | 0.0167        | CSARDRAGGSREYQYF    |
| 0.0183        | CAYRGITAGTASKLTF    | 0.0167        | CASRPPTGRHSPLHF     |
| 0.0183        | CALDPFTGGGNKLTF     | 0.0167        | CASKASGWEDTQYF      |
| 0.0183        | CAVAQRGGATNKLIF     | 0.0126        | CASSPRGGLAGLNTGELFF |

| TNBC#4        |                   |               |                     |
|---------------|-------------------|---------------|---------------------|
| TCR $\alpha$  |                   | TCR $\beta$   |                     |
| cloneFraction | aaSeqCDR3         | cloneFraction | aaSeqCDR3           |
| 0.0435        | CATDSLVAAGNNRKLW  | 0.0492        | CASSTPWGTAVSYEQYF   |
| 0.0435        | CVVTHFGGFKTIFF    | 0.0492        | CASSPPVRAYNEQFF     |
| 0.0435        | CVVSAKSNYQLW      | 0.0328        | CSANQLSTSGRWYNEQFF  |
| 0.0435        | CAMSHFGNEKLIFF    | 0.0328        | CASSRGGASYNQFF      |
| 0.0217        | CALSEARETSYDKVIF  | 0.0328        | CASSPPVREYGYTF      |
| 0.0217        | CAVRDKGSGNTGKLIFF | 0.0328        | CASSSPQGGVGYTF      |
| 0.0217        | CALRLDIQGAQKLVF   | 0.0328        | CATNEQGGEQFF        |
| 0.0217        | CAMREANTNAGKSTF   | 0.0164        | CASSTGGGPLLALQETQYF |
| 0.0217        | CAMREDYNAGNMLTF   | 0.0164        | CATSDLMTSGANTGELFF  |
| 0.0217        | CAYRGVQGAQKLVF    | 0.0164        | CASSPYLLQDMGYNEQFF  |

| TNBC#5        |                  |               |                   |
|---------------|------------------|---------------|-------------------|
| TCR $\alpha$  |                  | TCR $\beta$   |                   |
| cloneFraction | aaSeqCDR3        | cloneFraction | aaSeqCDR3         |
| 0.0288        | CAYRTARGSQGNLIF  | 0.0619        | CASGRSYEQYF       |
| 0.0288        | CAVDADGGSQGNLIF  | 0.0229        | CASSLQRGNNEQFF    |
| 0.0165        | CAGQEVGAGSYQLTF  | 0.0183        | CASSQVRGRQETQYF   |
| 0.0123        | CASPASGGSNYKLIFF | 0.0183        | CASSLEQGFPQFF     |
| 0.0123        | CAVSDSGGSNYKLIFF | 0.0183        | CAISRGYEQYF       |
| 0.0123        | CAVSHNAGNMLTF    | 0.0138        | CASSLGTSGGPGNEQFF |
| 0.0123        | CAMNVDTGRRALTF   | 0.0138        | CSGTGLEEQFF       |
| 0.0123        | CVVNSNNFNKFYF    | 0.0115        | CASSRNRGPYEYQYF   |
| 0.0123        | CATGDTGRRALTF    | 0.0115        | CASSRSYEQYF       |
| 0.0123        | CAETSQAGTALIF    | 0.0092        | CASSEMPRAGTEYGYTF |

| TNBC#6        |                  |               |                  |
|---------------|------------------|---------------|------------------|
| TCR $\alpha$  |                  | TCR $\beta$   |                  |
| cloneFraction | aaSeqCDR3        | cloneFraction | aaSeqCDR3        |
| 0.0256        | CAMETNRDDKIIF    | 0.0189        | CASSLTGDSNQPQHF  |
| 0.0230        | CAYRTGTASKLTF    | 0.0174        | CASSFGSSYEQYF    |
| 0.0205        | CAVTGNQFYF       | 0.0174        | CASSQSNAYEQYF    |
| 0.0128        | CAPREGTGRRALTF   | 0.0174        | CSGRGSYNEQFF     |
| 0.0102        | CAVRGRIGSARQLTF  | 0.0131        | CASSLGLLYNEQFF   |
| 0.0102        | CAESVGYGQNFVF    | 0.0131        | CASSLAGLAINEQYF  |
| 0.0102        | CAMRSGGSYIPTF    | 0.0102        | CASSLLGGGNTQYF   |
| 0.0077        | CVVSALSGGGADGLTF | 0.0087        | CSASGPGKGDYEYQYF |
| 0.0077        | CAVSASSGGSYIPTF  | 0.0087        | CASSLTSSYNEQFF   |
| 0.0077        | CAMDAGGTSYGKLIFF | 0.0087        | CASSRGTPEQFF     |

**Figure S2.** Top 10 most abundant TCR $\alpha$  and TCR $\beta$  sequences in each TNBC patient.

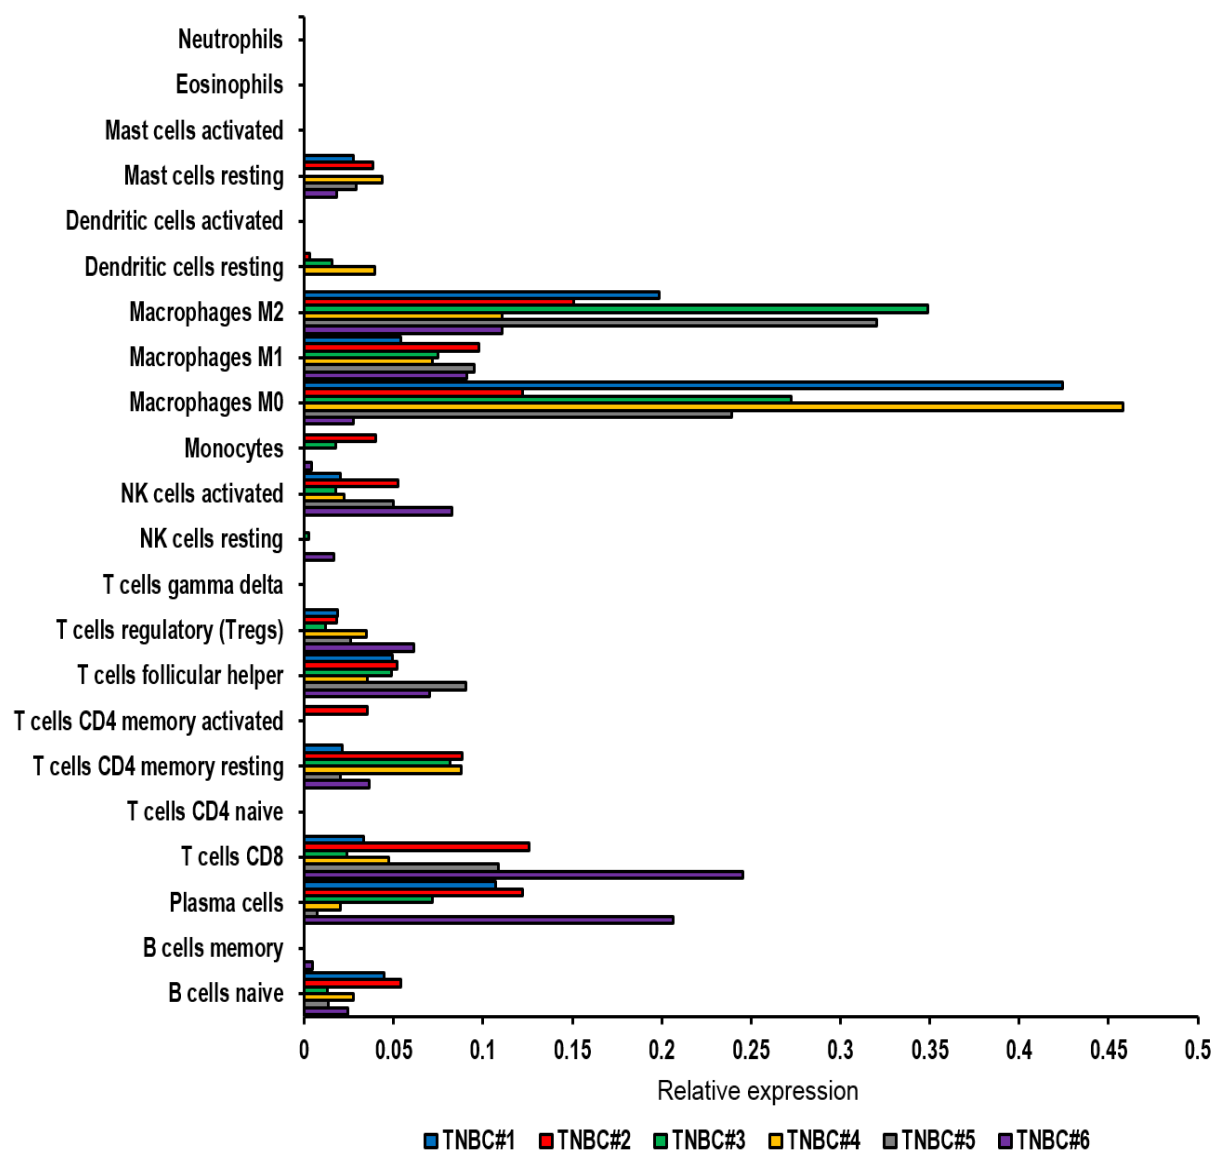

**Figure S3.** Immune composition of TIL-resident tissue. The immune composition of TIL-resident tissues from each TNBC patient was estimated using CIBERSORT. The relative proportion of specific immune cells was characterized using RNA-seq data.

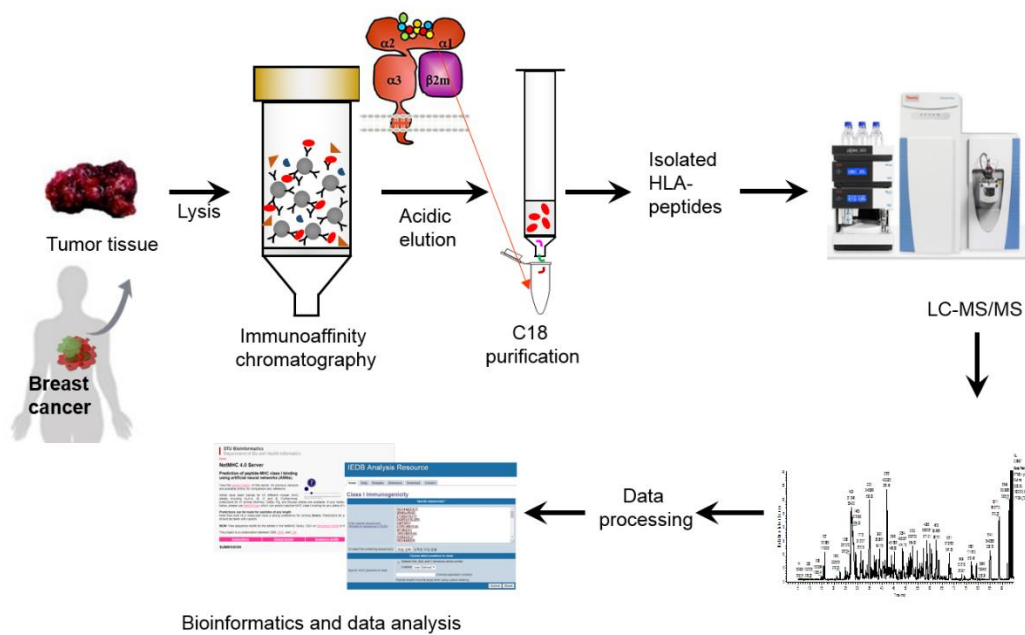

**Figure S4.** Overview of experimental HLA-peptidomics. HLA class I molecules were purified from lysates of TNBC tissues using the W6/32 monoclonal antibody bound to Amino-Link beads. HLA-peptide complexes were eluted from the affinity column, followed by LC-MS/MS analysis, with the identified peptides subjected to HLA class I binding and immunogenicity prediction using NetMHC and the IEDB Analysis Resource, respectively.

eIF4A-1\_GIYAYGFEK (46-54 a.a)

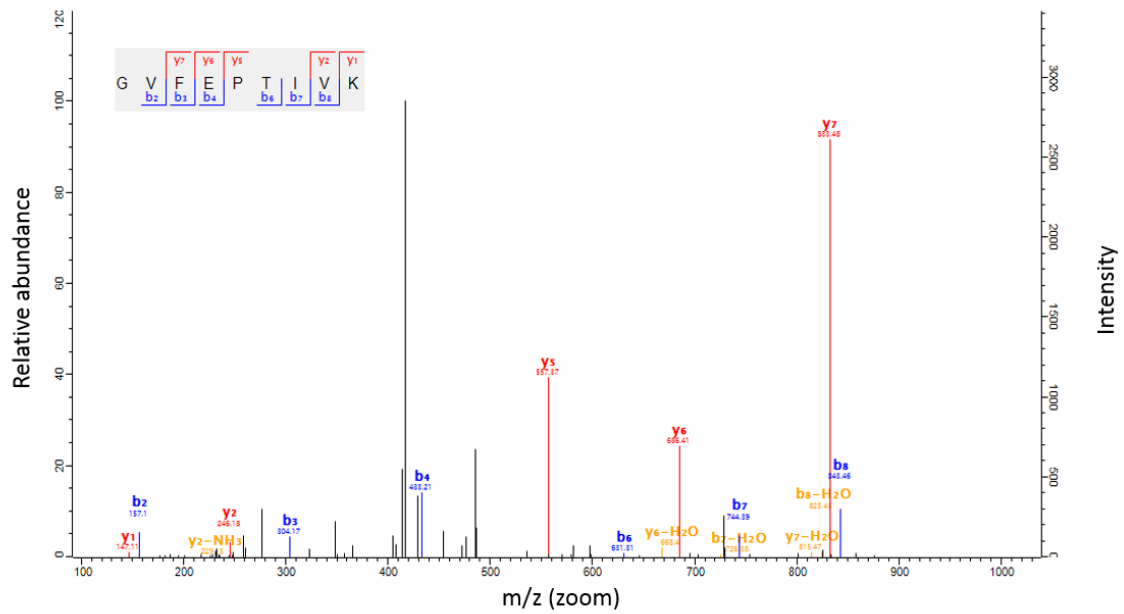

TCP1\_GVFPEITVK (502-510 a.a)

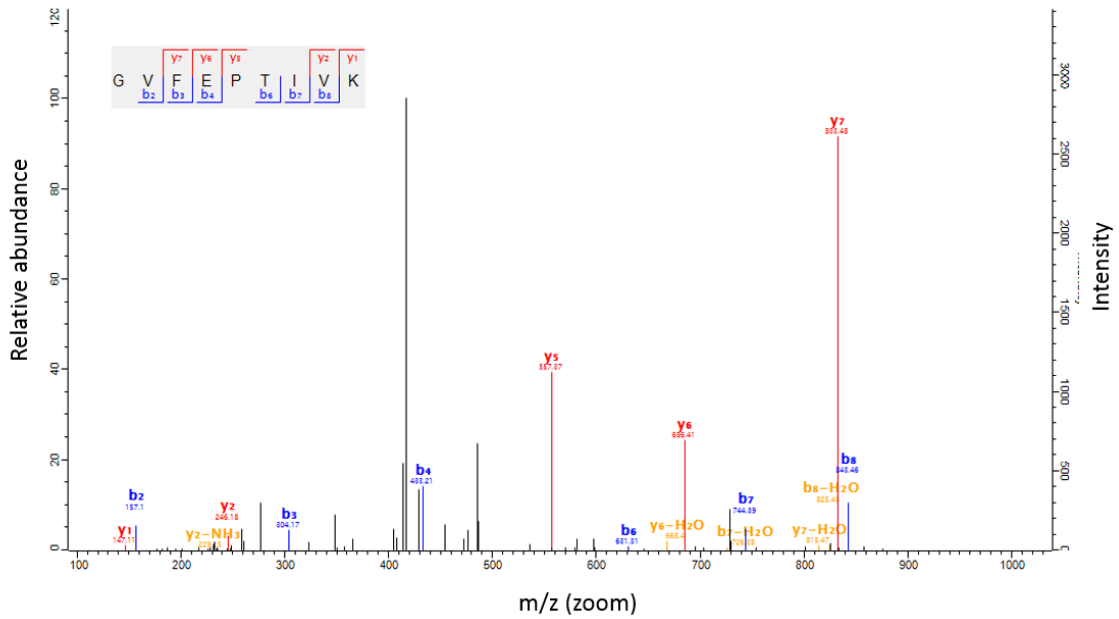

**Figure S5.** MS/MS spectra of representative eluted peptides from tissue from patient TNBC#2.

Peptide locations within the sequences of the matched proteins are marked with curved brackets.

**a**

| Patient ID                      | TNBC#1<br>(KUAH20<br>17-03-03) | TNBC#2<br>(KUAH201<br>7-03-02) | TNBC#3<br>(AMCT4)  | TNBC#4<br>(AMCT5)  | TNBC#5<br>(AMCT6)  | TNBC#6<br>(AMCT7)  |
|---------------------------------|--------------------------------|--------------------------------|--------------------|--------------------|--------------------|--------------------|
| No. peptides<br>(mg of lysates) | 5<br>(29)                      | 594<br>(41)                    | 743<br>(353)       | 1686<br>(261)      | 1444<br>(408)      | 1749<br>(182)      |
| HLA types                       | A*02:06<br>A*03:01             | A*11:01<br>A*11:01             | A*02:06<br>A*24:11 | A*24:02<br>A*30:01 | A*24:02<br>A*24:02 | A*02:01<br>A*33:03 |

**b**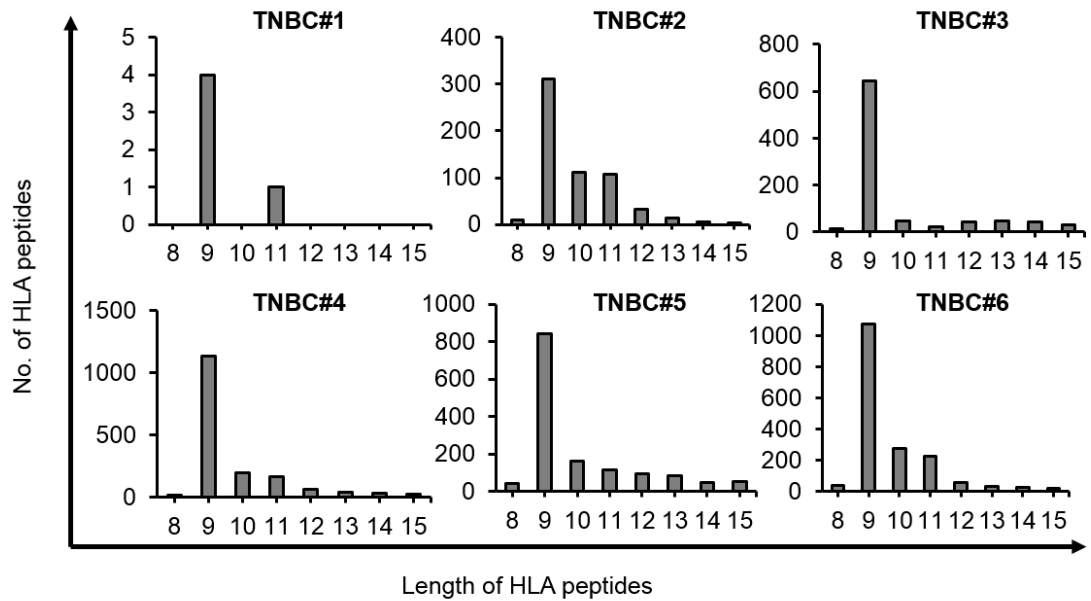

**Figure S6.** LC-MS/MS identification of eluted peptides with a 1% FDR. **(a)** The number of eluted peptides and the type of HLA-A alleles from six patients with TNBC. **(b)** The typical length of the eluted peptides from individual patients.

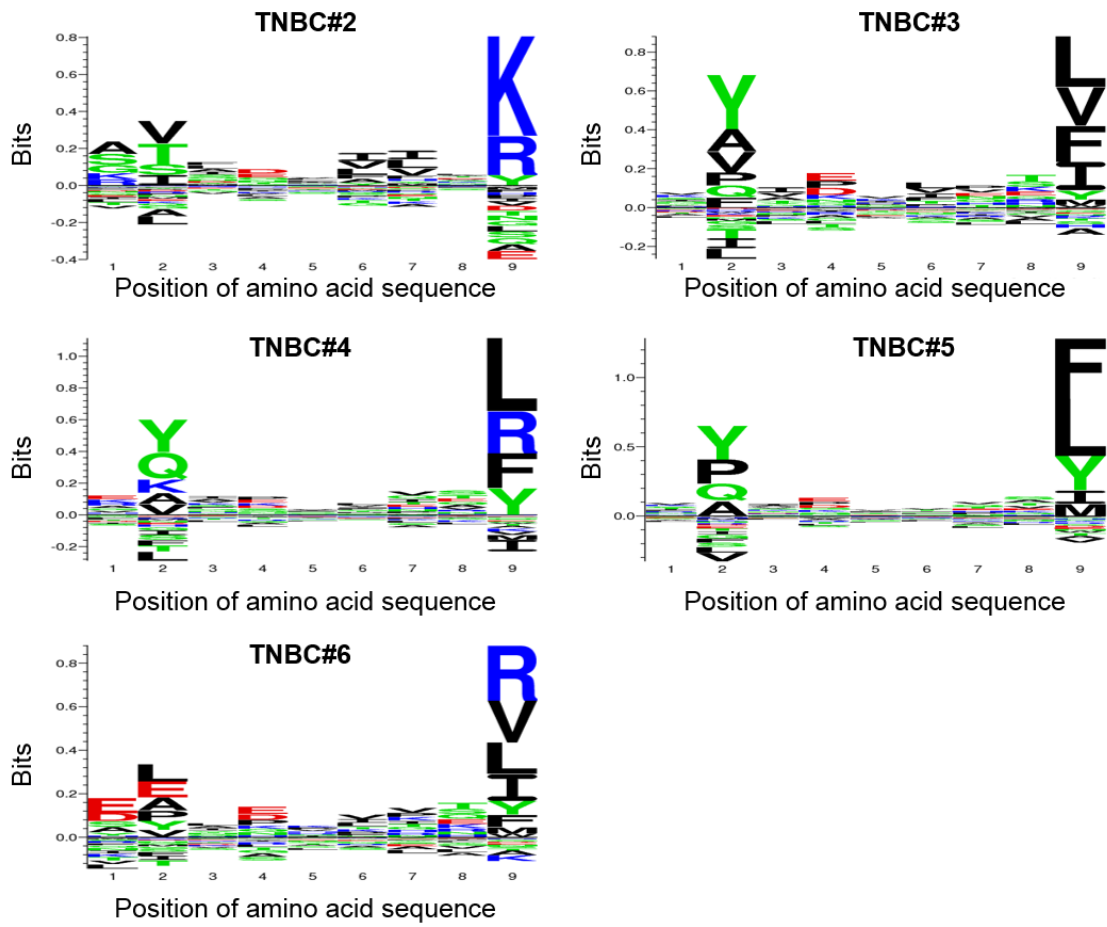

**Figure S7.** Sequence analysis of the HLA peptides. Logo plots showing sequence analysis of all 9-mer HLA peptides derived from each patient along with amino acid frequency distributions.



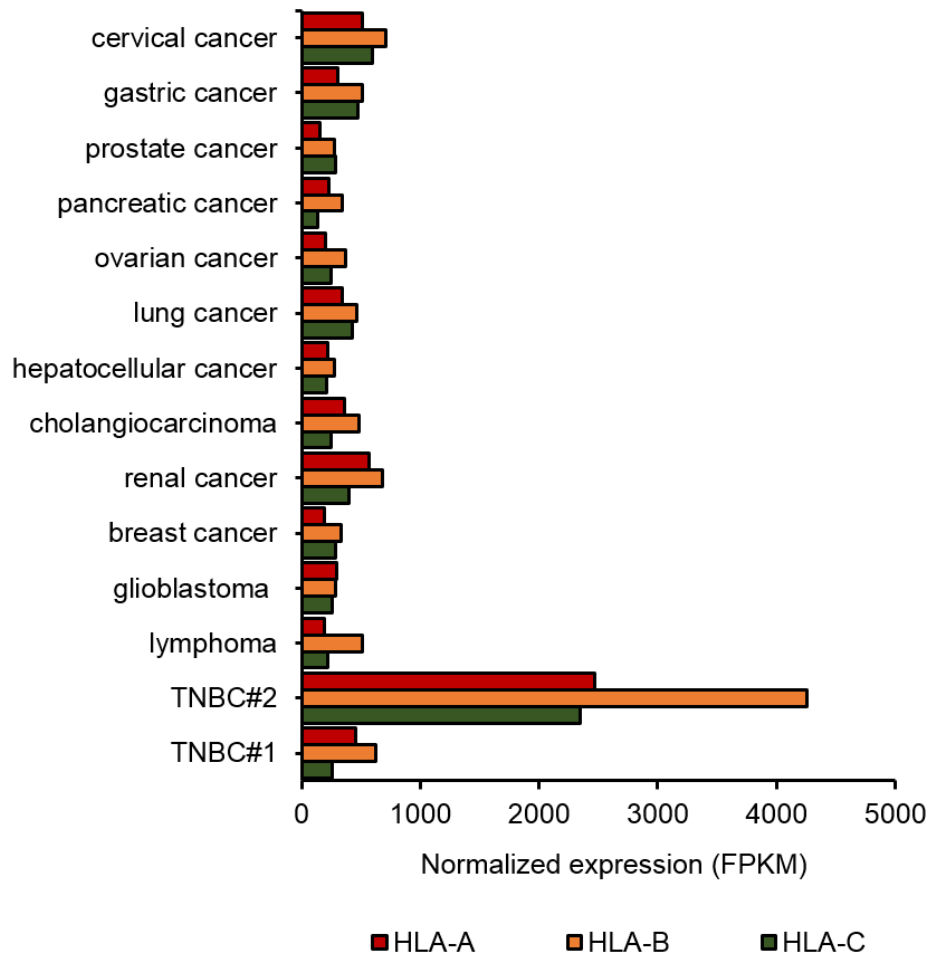

**Figure S8.** Comparison of expression of three MHC-class-I genes (HLA-A/B/C) in patients TNBC#1 and TNBC#2. Patient TNBC#2 showed stronger expression of MHC-I genes than that in other cancer tissues. The HLA expression of multiple cancers were obtained from the Expression Atlas.

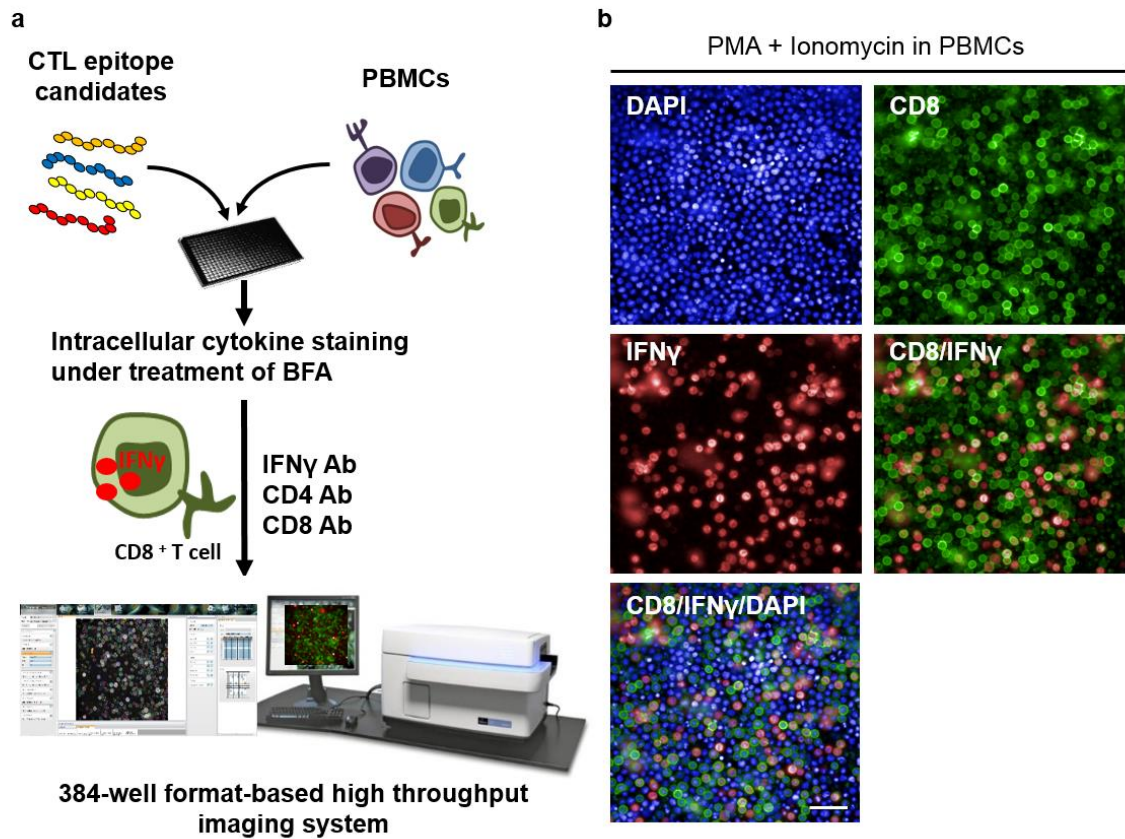

**Figure S9.** Identification of IFN $\gamma$  response against peptide-reactive T cells. **(a)** The scheme of the 384-well format-based screening system for detection of IFN $\gamma$ -producing CD8<sup>+</sup> T cells. **(b)** Intracellular IFN $\gamma$  was detected in PBMCs treated with PMA plus ionomycin. Scale bar, 100  $\mu$ m.

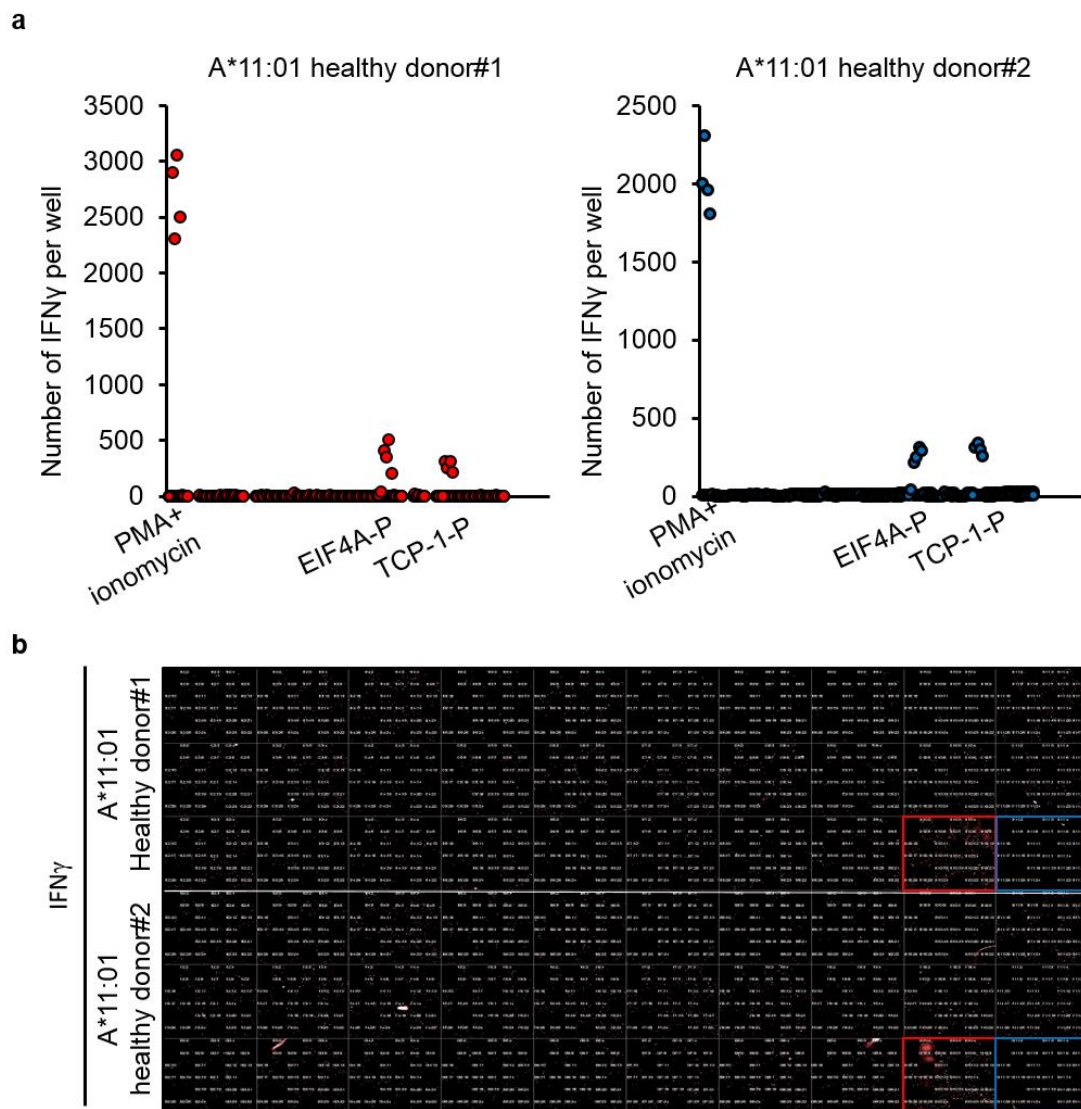

**Figure S10.** Overview of intracellular IFN $\gamma$  response of T cells in sample healthy donor #1 and #2. **(a)** Dot plots showing the number of intracellular IFN $\gamma$ -producing cells per individual wells in the two healthy donors. Quadruple replicate wells were used per treatment. **(b)** The overview images of IFN $\gamma$  signal per well. Red and blue boxes indicate positive and negative controls, respectively.

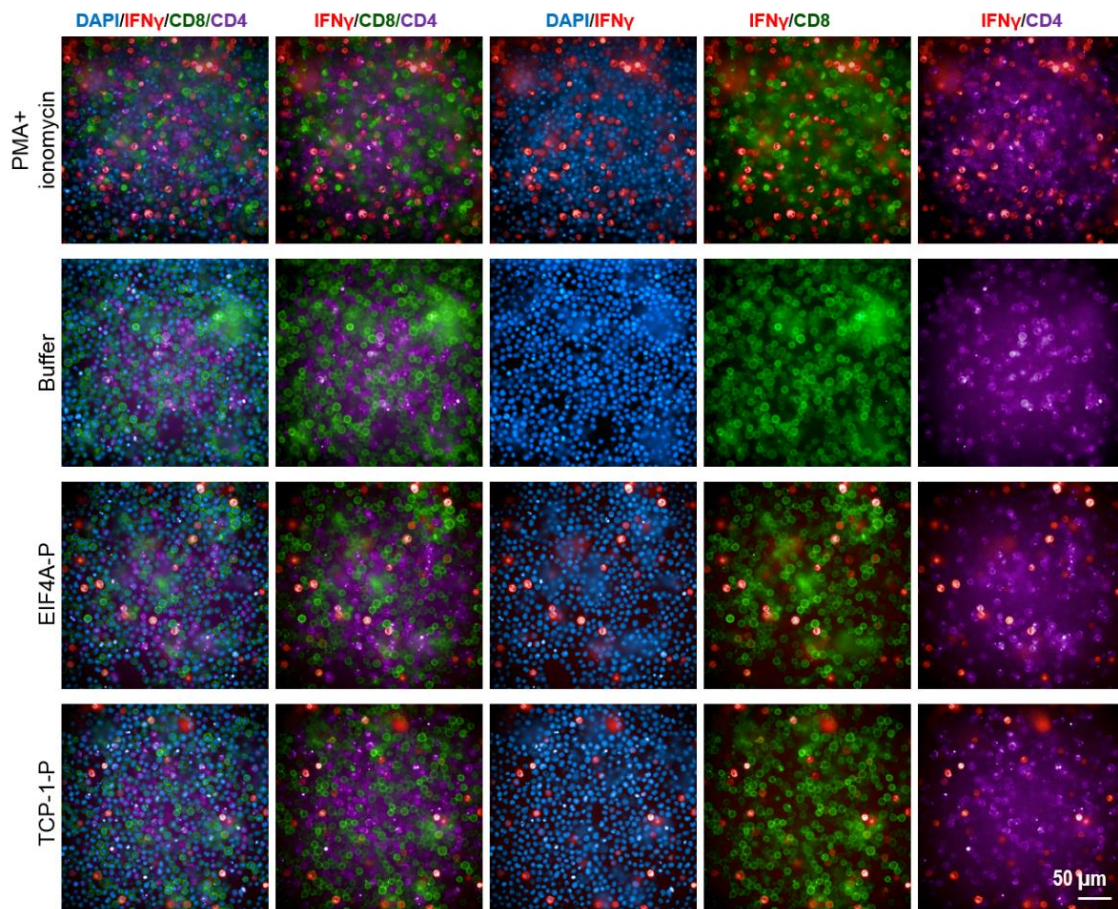

**Figure S11.** Single-cell imaging of the intracellular IFN $\gamma$  response. Single-cell-based imaging showing the intracellular IFN $\gamma$  response of T cells from tissue from healthy donor #1. Fluorescence imaging using the 384-well format was performed after ICS experiments. PMA (50 ng/mL) plus ionomycin (1  $\mu$ g/mL) was used for positive stimulation in the presence of Brefeldin A treatment to stop the secretion of intracellular IFN $\gamma$ . Blue, red, green, and violet colors represent nuclear, CD8<sup>+</sup> T cell, CD4<sup>+</sup> T cell, and intracellular IFN $\gamma$  staining, respectively. Scale bar, 50  $\mu$ m.
